# Supplementary material
Source: PubMed Central journal article supplement (PMC6251586)
Supplement: dex284suppl_table7.pdf [file dex284suppl_table7.pdf]

**Supplementary Table SVII Oocyte enriched biological functions within genes belonging to modules significantly associated with patient traits.**

| Module color (total genes) Trait (correlation, P-value) <sup>a</sup> | Function                                             | Gene count | FDR <sup>b</sup> | Genes                                                                                                                                                                                                                                                                                                                                                                                                                                                                                                                                                                                                                                                                                                                                                                                                                                                                                                |
|----------------------------------------------------------------------|------------------------------------------------------|------------|------------------|------------------------------------------------------------------------------------------------------------------------------------------------------------------------------------------------------------------------------------------------------------------------------------------------------------------------------------------------------------------------------------------------------------------------------------------------------------------------------------------------------------------------------------------------------------------------------------------------------------------------------------------------------------------------------------------------------------------------------------------------------------------------------------------------------------------------------------------------------------------------------------------------------|
| Germinal vesicle oocytes                                             |                                                      |            |                  |                                                                                                                                                                                                                                                                                                                                                                                                                                                                                                                                                                                                                                                                                                                                                                                                                                                                                                      |
| Sky blue (70) age (0.66, 0.04)                                       | Long term depression of hippocampal neurons          | 2          | 2.74E-02         | CAMK2A, HTT                                                                                                                                                                                                                                                                                                                                                                                                                                                                                                                                                                                                                                                                                                                                                                                                                                                                                          |
|                                                                      | Stress response of neurons                           | 2          | 2.74E-02         | HSD17B10, HTT                                                                                                                                                                                                                                                                                                                                                                                                                                                                                                                                                                                                                                                                                                                                                                                                                                                                                        |
|                                                                      | Transport of mitochondrial membrane                  | 2          | 2.74E-02         | HTT, TMEM14C                                                                                                                                                                                                                                                                                                                                                                                                                                                                                                                                                                                                                                                                                                                                                                                                                                                                                         |
|                                                                      | Concentration of GABA                                | 2          | 2.74E-02         | HTT, SLC6A11                                                                                                                                                                                                                                                                                                                                                                                                                                                                                                                                                                                                                                                                                                                                                                                                                                                                                         |
|                                                                      | Elongation of cellular protrusions                   | 3          | 2.74E-02         | CAMK2A, HTT, ICAM2                                                                                                                                                                                                                                                                                                                                                                                                                                                                                                                                                                                                                                                                                                                                                                                                                                                                                   |
|                                                                      | Branching of neurites                                | 5          | 2.74E-02         | CAMK2A, DLG5, HTT, PKP4, RND2                                                                                                                                                                                                                                                                                                                                                                                                                                                                                                                                                                                                                                                                                                                                                                                                                                                                        |
| Cyan (231) maturation% (-0.77, 0.01), blastocyst% (-0.67, 0.03)      | Proliferation of cells                               | 76         | 1.18E-02         | ACER3, AGGF1, AKIP1, ANP32A, ASPM, ATAD2, ATG5, ATRAID, BARD1, BCCIP, BCLAF1, BIRC6, BNIP3, CACYBP, CBX4, CDC25C, CDC42BPA, CDCA7, CDKN1B, CRY1, CSNK1G3, DCLRE1A, DKC1, DUSP6, EIF4E3, FNI, GRHL2, HPRT1, IDH1, KDM3A, KDM6A, KIDINS220, LAMA5, LGALS1, LPIN1, MAPK9, MELK, MLLT6, MSX2, MT2A, MYH7, NAA35, NFATC3, NOC3L, NOLC1, NSA2, PAG1, PAPSS2, PCNA, PLA2G10, PRKARIA, PRMT6, PTPN2, RAE1, RBL1, RNF34, SART1, SAVI, SEMA3A, SMURF2, STOX1, STRAP, STX2, SUMO2, TCP1, TIPIN, TNFRSF11B, TOM1L1, TOP1MT, TOP2A, TRPC4, UHRF2, WASF2, XRN2, ZNF143, ZNRF3                                                                                                                                                                                                                                                                                                                                      |
|                                                                      | Maturation of connective tissue cells                | 5          | 2.14E-02         | CDKN1B, LPIN1, MSX2, RBL1, TNFRSF11B                                                                                                                                                                                                                                                                                                                                                                                                                                                                                                                                                                                                                                                                                                                                                                                                                                                                 |
|                                                                      | Ubiquitination                                       | 13         | 2.84E-02         | ATG5, BIRC6, CRY1, ERCC8, FBXO45, HPRT1, MAPK9, RNF34, SHPRH, SUMO2, TRIM59, UHRF2, ZNRF3                                                                                                                                                                                                                                                                                                                                                                                                                                                                                                                                                                                                                                                                                                                                                                                                            |
|                                                                      | Growth of heart                                      | 7          | 3.61E-02         | AKIP1, CDKN1B, DUSP6, MAPK9, NFATC3, PRKARIA, SAVI                                                                                                                                                                                                                                                                                                                                                                                                                                                                                                                                                                                                                                                                                                                                                                                                                                                   |
|                                                                      | Cell cycle progression of cervical cancer cell lines | 4          | 4.50E-02         | CDC25C, CDKN1B, MMS22L, TCP1                                                                                                                                                                                                                                                                                                                                                                                                                                                                                                                                                                                                                                                                                                                                                                                                                                                                         |
|                                                                      | Metaphase II oocytes                                 |            |                  |                                                                                                                                                                                                                                                                                                                                                                                                                                                                                                                                                                                                                                                                                                                                                                                                                                                                                                      |
| Green (682) good quality blastocyst % (-0.72, 0.02)                  | Transcription of RNA                                 | 125        | 1.19E-06         | ACVR1B, ACVR2B, AKT1, ARID4A, ASH1L, ATRX, BACH2, BID, BMPRIA, BPTF, BRD4, BRD7, C14orf166, CBY1, CD3EAP, CDC5L, CEP290, CIR1, CKS1B, CRTC2, CRY1, DAP, DCP1A, DHX36, DNMT3B, DVL2, E2F1, EHMT1, EID1, EIF2S1, ELK4, ELP4, ENY2, EP300, EPC1, ERN1, FNI, FNIP2, FOS, FST, GNAQ, GNB1, GSK3A, GTF2F2, GTF2H4, HBG2, HDAC6, HEXB, HMGB1, HNRNPA1, HNRNPAB, HNRNPC, HOXA7, HTT, IFNB1, IKZF4, KLF2, KMT2D, MAFG, MAP2K1, MAP2K3, MAP2K6, MAZ, MLLT1, MLXIP, MORF4L2, MXD4, NCOA6, NELFB, NFATC3, NFIB, NIPBL, NKAP, NR6A1, NUFIP1, OSR2, PABPN1, PICALM, PIK3R2, POLR2H, POU2F2, POU4F2, PPP1R12A, PRMT2, PSMD9, PTMS, PTPN11, PTTG1, RBBP7, RBBP8, RNASEK, RNF10, SALL2, SBNO2, SET, SLC30A9, SMAD2, SMAD4, SMARCA4, SPEN, STAT3, STRAP, SUMO1, TAB2, TAF3, TAF5, TAF6, TCEA1, TET3, THRA, THRB, TLR2, TNFAIP1, TOX2, TP53, TP53INP1, TRIP11, YLPM1, YY1, YY1API, ZBTB17, ZC3H8, ZNF395, ZNF462, ZNF76 |
|                                                                      | Formation of nuclear foci                            | 11         | 4.68E-05         | BACH2, BARD1, BRD4, DNMT3B, EP300, FAAP24, HTT, PALB2, SUMO1, TP53, YY1                                                                                                                                                                                                                                                                                                                                                                                                                                                                                                                                                                                                                                                                                                                                                                                                                              |
|                                                                      | G2 phase                                             | 26         | 3.28E-04         | AKT1, ATRX, CDC5L, CKS1B, E2F1, EIF3E, ELAVL1, EP300, FBXL7, MAD2L1, MAP2K1, MAP2K6, MBD4, MCM10, MDC1, NUMB, PTPN11, PTTG1, RBBP8, RPA1, SKP2, SMARCA4, TAF6, TAOK3, TP53, YY1API                                                                                                                                                                                                                                                                                                                                                                                                                                                                                                                                                                                                                                                                                                                   |
|                                                                      | Size of embryo                                       | 31         | 5.03E-04         | BMPRIA, BPTF, CHMP5, DNMT3B, EP300, ERN1, FNI, HTT, KLF2, LMNB2, MAD2L1, MORF4L1, MORF4L2, NFI, NFATC3, NR6A1, NUMB, PALB2, PICALM, POFUT1, PTPN11, PTTG1, REV3L, SMAD2, SMAD4, STAT3, TCEA1, TP53, UBR4, YY1, ZBTB17                                                                                                                                                                                                                                                                                                                                                                                                                                                                                                                                                                                                                                                                                |
|                                                                      | Processing of RNA                                    | 27         | 6.86E-04         | BARD1, BRDT, BUD13, CDC40, CDC5L, CDK11B, ERN1, EXOSC3, EXOSC7, HNRNPA1, HNRNPC, HNRNPF, HTT, KHDRBS3, MTPAP, NOL8, NSRP1, NUFIP1, PABPC4, PABPN1, PPIG, PPIH, RBM11, RPL7, SNRPD1, SNRPD2, TRMT112                                                                                                                                                                                                                                                                                                                                                                                                                                                                                                                                                                                                                                                                                                  |

Continued

**Supplementary Table SVII** *Continued*

| Module color (total genes) Trait (correlation, P-value) <sup>a</sup> | Function                                 | Gene count | FDR <sup>b</sup> | Genes                                                                                                                                                                                                                                                                                                                                                                                                                                                                                                                                                                                                                                                                                                                                                                                                                                                                                                                                                 |
|----------------------------------------------------------------------|------------------------------------------|------------|------------------|-------------------------------------------------------------------------------------------------------------------------------------------------------------------------------------------------------------------------------------------------------------------------------------------------------------------------------------------------------------------------------------------------------------------------------------------------------------------------------------------------------------------------------------------------------------------------------------------------------------------------------------------------------------------------------------------------------------------------------------------------------------------------------------------------------------------------------------------------------------------------------------------------------------------------------------------------------|
|                                                                      | Organismal death                         | 133        | 2.14E-03         | ABCA5, ACVR1B, ACVR2B, AKAP9, AKT1, ARF6, ARID4A, ATP1A1, B4GALT1, BARD1, BID, BIRC6, BMPR1A, BPTF, CAPRINI, CBY1, CHMP5, CKS1B, CR2, DCLRE1C, DHX36, DNMT3B, DVL2, E2F1, EEF2K, EHMT1, EIF2AK3, EIF2S1, EIF4A1, ELAVL1, ENAH, EP300, ERN1, F9, FAT1, FN1, FOS, FST, FTO, GCH1, GJC1, GNAI1, GNAQ, GNB1, GNPAT, GPNMB, GRID2, HEXB, HMGBl, HNRNPA1, HNRNPAB, HNRNPC, HOXA7, HRH2, HTR2C, HTR7, HTT, ICA1, IFNB1, INCENP, KIF2A, KLF2, KMT2B, KMT2C, LAMC1, LAMP1, LIN7C, LMNB2, MAD2L1, MAFG, MAP2K1, MAP2K3, MBD5, MCM10, MKI67, MLLT1, MORF4L1, MORF4L2, MUT, NEDD4L, NELFB, NF1, NFATC3, NFIB, NIPBL, NOA1, NR6A1, NUMB, PALB2, PHC2, PICALM, POFUT1, POU2F2, PPIA, PPIG, PPP1R12A, PRMT1, PTPN11, PTPRN2, PTTG1, RASA3, RBBP8, RCE1, REV3L, RHEBL1, RPGRIP1L, RTN4, SALL2, SBNO2, SC5D, SH3GL1, SIAH2, SMAD2, SMAD4, SMARCA4, SPEN, STAT3, SYCP2, TAB2, TCEA1, THRA, THRB, TJP2, TLR2, TP53, TP53INP1, UBR4, UPF2, USE1, USP25, USP8, YY1, ZBTB17 |
|                                                                      | Abnormal morphology of embryonic tissue  | 40         | 3.47E-03         | ACVR1B, ACVR2B, BIRC6, BMPR1A, BPTF, CHMP5, DVL2, EP300, ERN1, FN1, GNAI1, GNAQ, HTT, INCENP, KLF2, KMT2B, LAMC1, MAD2L1, MAP2K1, MCM10, NF1, NFATC3, NOA1, NR6A1, NUMB, OFD1, PALB2, PHC2, PICALM, POFUT1, PTPN11, REV3L, RPGRIP1L, SALL2, SMAD2, SMAD4, STAT3, TP53, UBR4, ZBTB17                                                                                                                                                                                                                                                                                                                                                                                                                                                                                                                                                                                                                                                                   |
|                                                                      | Arrest in proliferation of cells         | 20         | 3.49E-03         | AKT1, E2F1, EP300, FOS, IFNB1, MAP2K3, MAP2K6, MAZ, NUMB, PHF1, PRMT1, PTTG1, SKP2, SMAD2, SMAD4, SMARCA4, STAT3, THRA, TP53, ZBTB17                                                                                                                                                                                                                                                                                                                                                                                                                                                                                                                                                                                                                                                                                                                                                                                                                  |
|                                                                      | Cell death of tumor cell lines           | 90         | 7.08E-03         | ACVR1B, ACVR2B, AIMP2, AKAP1, AKT1, ATP1A1, BACH2, BARD1, BID, BIRC6, BRD4, CHMP5, CNOT11, CRTC2, DNAJC15, DVL2, E2F1, EEF2K, EHMT1, EIF2AK3, EIF2S1, ELAVL1, EP300, ERN1, FAHD2A, FN1, FOS, FST, GNAI1, HDAC6, HNRNPA1, HNRNPC, HOXA7, HTT, IFNB1, INCENP, INIP, KLF2, KSRI, LAMP1, MAD2L1, MAP2K1, MAP2K3, MAP2K6, MAP3K9, MCM10, MDC1, NAA30, NAA35, NF1, NFIB, NUMB, OAZ1, ODC1, PARP16, PCBP2, PCDH15, PHF1, PPIA, PRMT1, PTPN11, PTPN13, PTTG1, RASSF3, RNFI3, RPA1, RTN4, SALL2, SAR1A, SIAH2, SKP2, SMAD2, SMAD4, ST3GAL1, STAT3, SUMO1, TAF6, TAOK3, THRA, TLR2, TM2D1, TMEM69, TMSB10/TMSB4X, TOLLIP, TP53, TPD52, UHRF2, VPS28, YY1, ZMYM3                                                                                                                                                                                                                                                                                                 |
|                                                                      | Size of animal                           | 17         | 7.65E-03         | AKT1, BIRC6, CAPRINI, CKS1B, DNMT3B, FOS, FST, LAMC1, LMNB2, MAP2K1, MORF4L1, NFIB, PHC2, REV3L, SMAD2, THRA, TP53                                                                                                                                                                                                                                                                                                                                                                                                                                                                                                                                                                                                                                                                                                                                                                                                                                    |
|                                                                      | Arrest in G2 phase of fibroblasts        | 5          | 1.10E-02         | MAP2K6, MBD4, PTPN11, SMARCA4, TP53                                                                                                                                                                                                                                                                                                                                                                                                                                                                                                                                                                                                                                                                                                                                                                                                                                                                                                                   |
|                                                                      | Morphology of thyroid gland              | 6          | 1.12E-02         | ABCA5, E2F1, FN1, SMAD2, THRA, THRB                                                                                                                                                                                                                                                                                                                                                                                                                                                                                                                                                                                                                                                                                                                                                                                                                                                                                                                   |
|                                                                      | Quantity of spermine                     | 3          | 1.12E-02         | HTT, OAZ1, ODC1                                                                                                                                                                                                                                                                                                                                                                                                                                                                                                                                                                                                                                                                                                                                                                                                                                                                                                                                       |
| Dark red (134) maturation% (0.72, 0.02)                              | Swelling of colorectal cancer cell lines | 2          | 3.87E-02         | FA2H, RAPIGAP                                                                                                                                                                                                                                                                                                                                                                                                                                                                                                                                                                                                                                                                                                                                                                                                                                                                                                                                         |
| Turquoise (2604) good quality blastocyst% (0.76, 0.01)               | Organization of organelle                | 114        | 2.74E-03         | ACP2, AFG3L2, ARL2, ATG7, AURKA, BAZ2A, BBS4, BCS1L, BLZF1, CCDC13, CDC25B, CDC42, CDH1, CFL1, CFL2, CHCHD3, CHMP1A, CHMP2A, CHMP2B, CHMP7, CLN6, CLTC, CNP, COG4, COX10, CSF1R, CTC1, CTDNEP1, DAXX, DES, DMRTC2, DNAJA3, DNAJB6, DNM1L, DOPEY2, DPYSL2, ERCCI, FIG4, FIS1, FSD1, GAA, GAK, GBF1, GNPTAB, GORASP1, GPI, GSN, HAUS8, HMGCL, HPS4, HPS5, IFT20, IGSF9, JUP, KIF4A, LAMTOR1, LIMK1, LIMK2, LRRTM4, LTBP2, MBP, MFSD8, MTRFR2, MUL1, MYH9, NCK2, NDEL1, NFASC, NLGN1, NPLOC4, NSFL1C, NUMA1, OBSL1, PAFAH1B1, PARK7, PARP1, PARP11, PES1, PEX1, PEX1A, PEX1B, PEX12, PEX16, PEX2, PHB, PIK3C3, PIN1, PINK1, PLK1, PPP1R9A, PPP1R9B, RAB3A, RAB43, RAB5B, RAB8A, RAD51D, RBBP4, RHOC, RRN3, SLC9A6, SOD1, SOD2, SPTBN5, STX17, SUN1, TMEM11, TRPV4, TSC1, TSC2, USO1, VCIPI1, VPS33B, VPS4A, VPS54                                                                                                                                        |
|                                                                      | Quantity of lysophospholipids            | 11         | 3.40E-03         | ABC4, AGPAT2, CD36, F2, LIPG, PDCC6IP, PLA2G6, PLPP2, PONI, SIRT6, SLC27A4                                                                                                                                                                                                                                                                                                                                                                                                                                                                                                                                                                                                                                                                                                                                                                                                                                                                            |

*Continued*

**Supplementary Table SVII** *Continued*

| Module color (total genes) Trait (correlation, P-value) <sup>a</sup> | Function                                 | Gene count | FDR <sup>b</sup>            | Genes                                                                                                                                                                                                                                                                                                                                                                                                                                                                                                                                           |
|----------------------------------------------------------------------|------------------------------------------|------------|-----------------------------|-------------------------------------------------------------------------------------------------------------------------------------------------------------------------------------------------------------------------------------------------------------------------------------------------------------------------------------------------------------------------------------------------------------------------------------------------------------------------------------------------------------------------------------------------|
| Red (582) fertilization% (-0.68, 0.03)                               | Cell death of cervical cancer cell lines | 77         | 3.40E-03                    | ABC7, ACD, AIFM1, ATG7, AURKB, BAD, BBS4, BIRC5, BOK, BUB1, BUB1B, CASP2, CASP3, CCAR2, CCND2, CDK1, CHTOP, CLK3, CSF1R, CTSB, DAP3, DAXX, DCC, DCLRE1B, DDI3, DIABLO, DNAJA3, DNMI1, EIF4G2, EZR, FASTKD2, FLNB, GORASP1, HAU58, IMMT, IRGM, KIF11, KIF14, LATS2, LCMT1, LYPLA2, MADD, MCRS1, NCOA4, NEK6, NUDCD3, OGFOD1, PAK1, PARP1, PDCD6IP, PIK3C3, PINK1, PLK1, PPP1R10, PSENI1, PSEN2, PTMA, RALB, RICTOR, RINT1, SMPD3, SOD1, SOD2, SRCAP, SRSF1, STYX1, TCPI1, TDGF1, TMEM214, TOP2A, TRAF2, TRAP1, TSC2, TUBA1A, TXNRD1, UCHL1, UCP2 |
|                                                                      | Quantity of mitotic spindle              | 9          | 7.95E-03                    | AURKA, AURKB, FLI1, KIF11, KIF2C, KIF4A, NUDCD3, PAK1, PLK1                                                                                                                                                                                                                                                                                                                                                                                                                                                                                     |
|                                                                      | Quantity of lysophosphatidic acid        | 10         | 8.24E-03                    | ABCB4, AGPAT2, CD36, F2, LIPG, PLA2G6, PLPP2, PON1, SIRT6, SLC27A4                                                                                                                                                                                                                                                                                                                                                                                                                                                                              |
|                                                                      | Homologous recombination                 | 31         | 1.01E-02                    | CDK2, CHCHD3, COPS7A, DDA1, FBXO18, HJURP, IK, KAT5, LRRC40, MAEL, MEPCE, PARP1, PRPF8, PSMC3IP, RAD51, RAD51D, RAD54B, RELN, RFC2, RPA2, SART1, SF3A3, SF3B2, SF3B5, SIRT6, SNRPA1, SNU13, SRCAP, SUN1, SYCP3, ZMYND8                                                                                                                                                                                                                                                                                                                          |
|                                                                      | Transport of protein                     | 63         | 1.43E-02                    | ACD, ADAR, APIG1, APIM1, AP2A1, AP2M1, AP3S2, AP4B1, ARCN1, ARF3, ASPSCR1, ATG14, BLZF1, CDK5, CFL1, CHCHD4, COG7, CRY2, CTSB, DNAJA4, DYNLT1, GGA1, IPO13, IPO9, JUP, KLC2, KPNA2, M6PR, MBP, MYH9, NDEL1, NSF, NUP214, NUP62, PEX1, PEX16, POLA2, PPP1R10, PSENI1, PSEN2, RAB11A, RAB7A, RAB8A, RBM22, RPAIN, SCAMP2, SCAMP3, SCFD1, SELK, SNX1, SNX13, SNX4, SOD1, STRADA, TIMM23, TSC2, USO1, VPS33B, VPS39, VPS41, WWP2, XPO6, ZP3                                                                                                         |
|                                                                      | Clathrin mediated endocytosis            | 19         | 1.84E-02                    | AP2A1, AP2B1, AP2M1, AP2S1, ASB1, ATP6V0D1, ATP6V0E1, ATP6V1B2, ATP6V1D, ATP6V1E1, CDC42, CLTC, DLL1, EPN1, GAK, KAT5, NAA60, SART1, SRSF3                                                                                                                                                                                                                                                                                                                                                                                                      |
|                                                                      | Metabolism of purine nucleotide          | 23         | 4.00E-02                    | ADSL, AMPD2, AMPD3, ATP5A1, ATP5B, ATP5F1, ATP5G1, ATP5H, ATP5L, ATP5O, BAD, COASY, CTNS, IDH3B, LHB, MDH1, PANK3, PDE1C, PGD, PPCDC, SHC1, SLC25A25, SLC27A4                                                                                                                                                                                                                                                                                                                                                                                   |
|                                                                      | Repair of DNA                            | 27         | 2.07E-05                    | APP, ATF2, BCLAF1, ERCC4, ERCC5, ERCC6, EXOG, GSTP1, HSPA1A/HSPA1B, MLH1, NAE1, NHEJ1, NRAS, POLG, POLH, POLK, RAD50, RIF1, RNF168, RNF2, SLX4, SMARCC2, SMC1A, TMEM161A, UIMC1, USP3, UVSSA                                                                                                                                                                                                                                                                                                                                                    |
|                                                                      | Cell death of fibroblasts                | 23         | 2.44E-04                    | APP, ATF2, EIF2AK2, EIF4E, EMD, EPHX1, GAB1, GPX4, IKBKG, MAPK14, MAPK8, MEN1, MLH1, NEK1, NRAS, OPA1, POLK, PPP1R15A, RBICC1, SLK, STK3, STK4, TCEB3                                                                                                                                                                                                                                                                                                                                                                                           |
|                                                                      | Movement of organelle                    | 10         | 4.18E-03                    | APP, DNAH5, EMD, HAP1, KIF1C, MYO5A, MYO6, RAB6A, RSPH9, SYNE2                                                                                                                                                                                                                                                                                                                                                                                                                                                                                  |
|                                                                      | Light sensitivity of skin                | 3          | 1.22E-02                    | ERCC6, POLH, TROVE2                                                                                                                                                                                                                                                                                                                                                                                                                                                                                                                             |
|                                                                      | Orientation of Golgi apparatus           | 4          | 1.22E-02                    | ARFGEF1, DCTN1, SLK, STRN                                                                                                                                                                                                                                                                                                                                                                                                                                                                                                                       |
|                                                                      | Damage of chromosomes                    | 7          | 3.15E-02                    | ERCC4, HSPA1A/HSPA1B, MCM9, MCPH1, NHEJ1, POLH, SLX4                                                                                                                                                                                                                                                                                                                                                                                                                                                                                            |
| Abnormal morphology of mitral valve                                  | 4                                        | 3.28E-02   | ADAM15, ADAM17, ADAM9, TLL1 |                                                                                                                                                                                                                                                                                                                                                                                                                                                                                                                                                 |

Biological function enrichment analysis was conducted using IPA.

Gene modules within the respective stages contain unique genes.

<sup>a</sup>Physical traits significantly ( $P < 0.05$ ) correlated with respective gene modules.

<sup>b</sup>Benjamini-Hochberg multiple testing correction  $P$ -value (FDR).
